1 **Integrating telemetry data into spatial capture-recapture modifies inferences on**  
2 **multi-scale resource selection**

3

4 Daniel W. Linden<sup>1\*†</sup>, Alexej P.K. Sirén<sup>2§</sup>, Peter J. Pekins<sup>2</sup>

5 <sup>1</sup>New York Cooperative Fish and Wildlife Research Unit, Department of Natural Resources,  
6 Cornell University, Ithaca, NY, 14853, USA.

7 <sup>2</sup>Department of Natural Resources and the Environment, University of New Hampshire, Durham,  
8 NH, 03824, USA.

9 \* Present address: Greater Atlantic Regional Fisheries Office, NOAA National Marine Fisheries  
10 Service, Gloucester, MA, 01930, USA

11 § Present address: DOI Northeast Climate Science Center, University of Massachusetts, Amherst,  
12 MA, 01003, USA

13

---

D.W. Linden, [daniel.linden@noaa.gov](mailto:daniel.linden@noaa.gov); A.P.K. Siren, [asiren@umass.edu](mailto:asiren@umass.edu); P.J. Pekins,  
[pete.pekins@unh.edu](mailto:pete.pekins@unh.edu)

14 **Abstract**

15 Estimating population size and resource selection functions (RSFs) are common approaches in  
16 applied ecology for addressing wildlife conservation and management objectives. Traditionally  
17 such approaches have been undertaken separately with different sources of data. Spatial capture-  
18 recapture (SCR) provides a framework for jointly estimating density and multi-scale resource  
19 selection, and data integration techniques provide opportunities for improving inferences from  
20 SCR models. Here we illustrate an application of integrated SCR-RSF modeling to a population  
21 of American marten (*Martes americana*) in alpine forests of northern New England. Spatial  
22 encounter data from camera traps were combined with telemetry locations from radio-collared  
23 individuals to examine how density and space use varied with spatial environmental features.  
24 We compared multi-model inferences between the integrated SCR-RSF model with telemetry  
25 and a standard SCR model with no telemetry. The integrated SCR-RSF model supported more  
26 complex relationships with spatial variation in third-order resource selection (i.e., individual  
27 space use), including selection for areas with shorter distances to mixed coniferous forest and  
28 rugged terrain. Both models indicated increased second-order selection (i.e., density) for areas  
29 close to mixed coniferous forest, while the integrated SCR-RSF model had a lower effect size  
30 due to modulation from spatial variability in space use. Our application of the integrated SCR-  
31 RSF model illustrates the improved inferences from spatial encounter data that can be achieved  
32 from integrating auxiliary telemetry data. Integrated modeling allows ecologists to join  
33 empirical data to ecological theory using a robust quantitative framework to better address  
34 conservation and management objectives.

35 **Key words:** American marten; density estimation; integrated modeling; noninvasive sampling;  
36 *Martes americana*; radio-telemetry; spatial capture-recapture

## 37 **Introduction**

38           Understanding the environmental features that influence variation in species abundance  
39 or density is a common objective in wildlife conservation and management. Approaches to  
40 estimating population size and habitat selection have traditionally required distinct forms of data  
41 collection and separate modeling methods; spatial capture-recapture (SCR) allows for joint  
42 estimation of both ecological processes using a single data source or through integration of  
43 multiple data sources in a single analytical framework (Royle, Fuller & Sutherland 2017). The  
44 development of SCR was initially motivated by the need to address the spatial dynamics of field  
45 sampling and animal movement to improve density estimation from capture-recapture methods  
46 (Efford 2004; Royle & Young 2008). By using spatial information on the location of  
47 observations, SCR combines a point process model for the distribution of individuals in a  
48 population with a probability model for the encounters or captures of those individuals. As with  
49 other recent statistical advances in ecology (Gimenez *et al.* 2014), the hierarchical model  
50 formulation of SCR has enabled custom data integration techniques and, therefore, expanded the  
51 scope of inferences possible from trapping and other spatial encounter data (Sollmann *et al.*  
52 2013a; Chandler & Clark 2014). While these developments are promising, as the complexity of  
53 modeling methods increases so do the data demands for parameter estimation (Auger-Methe *et*  
54 *al.* 2016) and the need for practical implementation options (Bolker *et al.* 2013). Producing valid  
55 and useful inferences for helping achieve objectives in applied ecology requires finding a  
56 balance between comprehensive models and logistically feasible data.

57           Royle *et al.* (2013) developed a spatial capture-recapture model that integrates telemetry  
58 information and resource selection functions (RSFs) to provide improved accuracy and precision  
59 for density estimation. The improved accuracy is particularly relevant when resource selection at

60 one or more spatial scales affects the distribution of individuals (i.e., second-order selection;  
61 Johnson 1980) and/or individual space use (i.e., third-order selection). While the approach  
62 seems promising and uses commonly collected wildlife data, it has been rarely applied in the  
63 literature. Proffitt *et al.* (2015) included a resource selection function in an SCR model of a large  
64 carnivore but estimated the function with telemetry data first before using the predictions as a  
65 covariate in their SCR model fitting. They implied that the Royle *et al.* (2013) model  
66 represented a “methodologically intensive joint estimation framework” which might preclude  
67 interested users from easily applying it. The multi-step approach to RSF integration in SCR is a  
68 potentially interesting and practical compromise, whereby a complex function is reduced to a  
69 univariate prediction to serve as a single spatial covariate in the model (Efford 2015). Proffitt *et*  
70 *al.* (2015) used this method to address spatial variation in density – they did not incorporate it in  
71 their encounter probability model, despite having data that may have allowed for modeling  
72 variation in individual space use. In general, SCR models are more sensitive to the structure of  
73 the encounter model than the density model, as the latter has been found to be highly flexible to  
74 misspecification (Efford & Fewster 2013; Royle *et al.* 2014) while the former has long been a  
75 focus of refinements to capture-recapture methods (Dorazio & Royle 2003). As referenced  
76 earlier, individual heterogeneity to capture was a primary motivation for SCR (Efford 2004).  
77 Thus, in SCR applications where individual space use is hypothesized to be highly variable,  
78 accounting for third-order selection in the encounter model may be important regardless of  
79 whether ancillary telemetry data are available.

80         The task of estimating variation in space use with a spatial capture-recapture design alone  
81 is made difficult by the required sample sizes in the various data dimensions. Importantly, the  
82 number and configuration of trapping devices needs to be such that adequate coverage across

83 some gradient of habitat resources is achieved. This requires some traps to be placed within or  
84 adjacent to relatively poor habitat, even though doing so may result in little information (i.e.,  
85 zero encounters) being collected for the logistical effort expended. Since the placement of traps  
86 will interact with both the distribution of individuals on the landscape and individual space use,  
87 the number of encounters at a trap will be a function of the realized dynamics of both processes  
88 (Royle *et al.* 2014). Thus, an optimal trap layout for estimating multi-scale resource selection  
89 will purposefully expend trapping effort in locations where few individuals exist and where  
90 individuals, even when present nearby, may be unlikely to visit. Such a design creates tension  
91 with the general goal of obtaining as many encounters of as many individuals as possible to  
92 enable model fitting and accurate parameter estimation (Royle *et al.* 2014).

93 Here, we illustrate an application of the integrated SCR-RSF model developed by Royle  
94 *et al.* (2013) using a multi-year study on American marten (*Martes americana*) in New  
95 Hampshire, USA (Sirén *et al.* 2016a; Sirén *et al.* 2016b). Marten are a forest-sensitive meso-  
96 carnivore often used as an indicator species for forest conservation and management given their  
97 vulnerability to anthropogenic disturbance and climate change (Carroll 2007). We used remote  
98 camera stations to photograph and identify individual marten according to their unique pelage  
99 patterns (Sirén *et al.* 2016a) and combined these data with telemetry locations collected on a  
100 subset of radio-collared individuals (Sirén *et al.* 2016b). The sampling occurred across a  
101 heterogeneous alpine forest landscape that was recently modified by a wind farm installment and  
102 within which marten were shown to be differentially selecting resources at multiple scales.  
103 Using the integrated SCR-RSF likelihood (Royle *et al.* 2013), we estimated marten density and  
104 parameters associated with multi-scale resource selection and compared the resulting multi-  
105 model inferences both with and without the telemetry data integration. Notably, we modified the

106 likelihood to accommodate a lack of independence between the data sources, given that all radio-  
107 collared individuals were also photo-captured by camera traps. This integrated SCR-RSF model  
108 was added to the R package `oSCR` (Sutherland, Royle & Linden 2016) to facilitate use by  
109 interested researchers. Our example here provides further evidence that improved inferences on  
110 variation in population density are possible when additional information on movement and  
111 resource selection from telemetry data are integrated with spatial capture-recapture models.

112

## 113 **Materials and methods**

### 114 **STUDY AREA AND SAMPLING**

115 We sampled marten in a ~62 km<sup>2</sup> area of New England-Acadian forest in northern New  
116 Hampshire, USA during 2010–2012 (Figure S1). Extensive descriptions of the study area and  
117 sampling details have been previously outlined (Sirén *et al.* 2016a; Sirén *et al.* 2016b). The area  
118 was centered on some mountains containing a new 33-turbine wind farm with elevation ranging  
119 624–1045 m. Forests were primarily mature conifers at high elevations (>823 m) and a mix of  
120 mature and commercially harvested hardwoods at lower elevations. Topography was variable  
121 with rugged terrain dispersed throughout and winters in the region (1948–2013) were cold with  
122 high annual snowfall (average = 288 cm; range = 79–881 cm; National Climate Data Center:  
123 <http://www.ncdc.noaa.gov>).

124 Marten were photo-captured by remote cameras during 2 winters (Sirén *et al.* 2016a) and  
125 live-captured year-round to maintain 6–10 individuals with active VHF radio collars during the  
126 study (Sirén *et al.* 2016b). Telemetry fixes from collared individuals were obtained weekly  
127 using standard methods of triangulation; here, we restricted the data to fixes collected during the  
128 2 leaf-off (i.e., winter) time periods (14 Nov 2010 to 15 May 2011 and 16 Oct 2011 to 15 May

129 2012) which overlapped with the winter sampling by remote cameras (14 Feb 2011 to 2 Apr  
130 2011 and 3 Jan 2012 to 19 Jan 2012). Location error was estimated to be 2 ha (Sirén *et al.*  
131 2016b). We used 30 total camera trapping stations during each sampling period that were baited  
132 with sardines and a commercial skunk (*Mephitis mephitis*) lure. Stations were operational for 12  
133 d in 2011 and 8 d in 2012, with bait replaced halfway through, and were located in a nonrandom  
134 pattern to achieve a spacing of 500–950 m (Figure 1). Marten photo-captures were identifiable  
135 to individual when ventral patches were clearly visible and multiple observers could agree on  
136 assignment; sex was assigned to un-collared individuals based on morphological comparisons  
137 with collared individuals (Sirén *et al.* 2016a).

138

### 139 INTEGRATED SCR-RSF MODEL

140 We estimated multi-scale habitat selection of marten using the spatial encounters of individuals  
141 at camera traps and the telemetry locations of collared individuals with the integrated SCR-RSF  
142 model (Royle *et al.* 2013). A discrete-space representation of the study area was required to  
143 allow spatial environmental covariates to influence the space use of individuals (third-order  
144 selection) and the distribution of individuals (second-order selection) on the landscape. The  
145 discretization of the landscape accommodates a straightforward formulation of the space usage  
146 model that links the camera trap and telemetry data under the integrated SCR-RSF model (Royle  
147 *et al.* 2013). Using the notation of Royle *et al.* (2013), we can define the set of coordinates  $\mathbf{x}_1$ ,  
148  $\dots$ ,  $\mathbf{x}_{nG}$  for each pixel  $g$  on the landscape of  $nG$  pixels and estimate the likelihood of observing  
149 the data for individuals in pixels conditional on  $\mathbf{s}$ , the latent centroids of activity (i.e., home range  
150 centers) for individuals, and  $z(\mathbf{x})$ , the covariate value(s) for all pixels. Importantly, individual  
151 use of a pixel is considered a Poisson random variable with an average rate  $\lambda(\mathbf{x}|\mathbf{s})$  for both data

152 likelihoods. While the total probability of observing an individual in a given pixel differs  
153 between the camera trap and telemetry data (as a function of the sampling rate and other features  
154 of each device), the mechanisms underlying spatial variation are assumed to be the same,  
155 allowing parameters to be shared in the joint likelihood (Royle *et al.* 2013).

156 Our discrete landscape for marten was defined by a 3.75 km buffer of the trapping array  
157 composed of  $200 \text{ m} \times 200 \text{ m}$  pixels for a total of  $nG = 2,709$  non-water pixels. The buffer  
158 accommodated individual movement in the sampled population and the pixel resolution was  
159 small enough to distinguish differences in space usage within home ranges. We summarized the  
160 telemetry data as pixel-specific counts,  $m_{ig}$ , for each of  $i = 1, 2, \dots, N_{\text{tel}}$  collared individuals at each  
161 pixel  $g$ . Spatial encounters at camera traps,  $y_{ijk}$ , were defined for each of  $i = 1, 2, \dots, n$  photo-  
162 captured individuals at camera trap  $j$  on survey  $k$  as binary variables, condensing any clusters of  
163 encounters that occurred in a given day to a single “detection” (Siren *et al.* 2016a). We extracted  
164 the spatial covariate values for trap  $j$  from the pixel within which the trap was located, such that  
165  $\mathbf{z}_j \equiv \mathbf{z}(\mathbf{x}_j)$ . The spatial covariates we considered for influencing habitat selection included the  
166 average distance to mixed-coniferous forest and the vector ruggedness measure (VRM;  
167 Sappington, Longshore & Thompson 2007) for each pixel; see Sirén *et al.* (2016b) for more  
168 information on the remote sensing data and additional justification for the habitat covariates.

169 Following Royle *et al.* (2013), we modeled the spatial encounters,  $y_{ijk}$ , as Bernoulli  
170 random variables such that  $\Pr(y_{ijk} > 0 \mid \mathbf{x}_j, \mathbf{s}_i) = p_{ijk}$ , and under a Gaussian hazard model,  $p_{ijk} = 1 -$   
171  $\exp(-\lambda_{ijk})$ . In this way,  $\lambda_{ijk}$  represents the average encounter rate for the trap in pixel  $\mathbf{x}_j$ , assuming  
172 the latent “use frequency” (i.e., 3<sup>rd</sup> order selection) is a Poisson random variable. This use  
173 frequency is unobservable for the camera trap data due to difficulty in distinguishing  
174 independent encounters within a survey but links directly to the use frequency indicated by the



175 telemetry data (Royle *et al.* 2013). Here, we modeled the encounter rate of marten as a function  
176 of several components: 1) availability for an individual, given the location of its latent activity  
177 center; 2) resource selection of spatial covariate values for the camera trap; 3) year during which  
178 the individual was photo-captured; 4) sex of the individual; and 5) a trap-specific behavioral  
179 response. The first two components address the crux of the methodological development  
180 presented by Royle *et al.* (2013), while the remaining components are specific to the marten  
181 study. Our log-linear model was therefore:

$$\begin{aligned} 182 \quad \log(\lambda_{ijk}) = & \alpha_0 - \alpha_{1i}d(\mathbf{x}_j, \mathbf{s}_i)^2 + \alpha_{2,\text{mixed}}\text{mixed}_j + \alpha_{2,\text{vrm}}\text{vrm}_j + \alpha_{2,\text{vrm}2}\text{vrm}_j^2 \\ 183 \quad & + \alpha_{2012}\text{yr}_i + \alpha_{\text{male}}\text{sex}_i + \alpha_{2012,\text{male}}\text{yr}_i \times \text{sex}_i + \alpha_{\text{behav}}C_{ijk} \end{aligned}$$

184 where  $d(\mathbf{x}_j, \mathbf{s}_i)$  is the Euclidean distance between trap  $j$  and the latent activity center for individual  
185  $i$ , and  $\alpha_{1i} = 1/(2\sigma_i^2)$ , where  $\sigma_i$  represents the scale parameter of the half-normal distance function.  
186 In this way,  $\alpha_{1i}d(\mathbf{x}_j, \mathbf{s}_i)^2$  quantifies the “availability” of a trap pixel conditional on  $\mathbf{s}_i$  for the  
187 individual. The spatial covariates were standardized with mean 0 and unit variances, after  
188 distance to mixed conifers ( $\text{mixed}_j$ ) was square-root transformed and terrain ruggedness ( $\text{vrm}_j$ )  
189 was log-transformed. Year and sex were both binary variables indicating whether an individual  
190 was encountered in 2012 ( $\text{yr}_i = 1$ ) and its sex was male ( $\text{sex}_i = 1$ ), including a potential  
191 interaction. Finally, the behavioral response used  $C_{ijk} = 1$  for all  $k$  after the initial encounter of  
192 individual  $i$  at trap  $j$ , and 0 otherwise. We allowed  $\sigma_i$  to vary according to year and sex:

$$193 \quad \log(\sigma_i) = \delta_0 + \delta_{2012}\text{yr}_i + \delta_{\text{male}}\text{sex}_i + \delta_{2012,\text{male}}\text{yr}_i \times \text{sex}_i$$

194 This accounted for potential differences in the scale of movement between sexes and years. We  
195 also treated sex as a random variable and estimated  $\phi_{\text{male}} = \Pr(\text{sex}_i = 1)$  using the model extension  
196 described in (Royle *et al.* 2015).

197 We used the pixel-specific frequencies from the telemetry data to estimate use  
198 probabilities under a multinomial distribution such that  $m_{ig} \sim \text{Multinomial}(R_i, \pi_{ig})$ , where  $R_i$  is the  
199 number of telemetry fixes for individual  $i$  and  $\pi_{ig}$  is the relative probability of use as defined by

$$200 \quad \pi_{ig} = \frac{\exp(-\alpha_{1i}d(\mathbf{x}_g, \mathbf{s}_i)^2 + \alpha_{2,\text{mixed}}\text{mixed}_g + \alpha_{2,\text{vrm}}\text{vrm}_g + \alpha_{2,\text{vrm}2}\text{vrm}_g^2)}{\sum_g \exp(-\alpha_{1i}d(\mathbf{x}_g, \mathbf{s}_i)^2 + \alpha_{2,\text{mixed}}\text{mixed}_g + \alpha_{2,\text{vrm}}\text{vrm}_g + \alpha_{2,\text{vrm}2}\text{vrm}_g^2)}$$

201 Here, the individual- and pixel-specific usage rate (i.e., the numerator) is formulated with a  
202 similar log-linear model as the encounter rate for the spatial encounters at camera traps, with the  
203 exception that the rate is not survey specific and is only a function of attributes that vary by  
204 location. Another difference is that the usage rate is defined at all pixels ( $g$ ) in the state space,  
205 not only the pixels with camera traps. Since the usage rate is a function of availability, the  
206 individual rates and relative probabilities are conditional on  $\mathbf{s}_i$  and variation in the movement  
207 scale ( $\sigma_i$ ) is defined by the same log-linear model.

208 We modeled variation in the distribution of activity centers, representing 2<sup>nd</sup> order  
209 resource selection by marten, by specifying an inhomogeneous point process (Borchers & Efford  
210 2008). Here, the expected density in a given pixel  $g$  was a linear function (on the log scale) of  
211 the distance to mixed conifer forest:

$$212 \quad \log(\mathbb{E}(D_g)) = \beta_0 + \beta_{\text{mixed}}\text{mixed}_g$$

213 This density model determined the prior probability of an activity center being located in any  
214 given pixel according to:

$$215 \quad \Pr(s_i = g | \boldsymbol{\beta}) = \frac{\mathbb{E}(D_g)}{\sum_g \mathbb{E}(D_g)}$$

216 where  $s_i$  now represents a pixel ID instead of two-dimensional coordinates. Since the likelihoods  
217 of the data for both the spatial encounters and the telemetry fixes are conditional on  $s_i$ , the

218 marginal likelihood is calculated by integrating over all possible pixel values (i.e., the Poisson-  
219 integrated likelihood approach; Borchers & Efford 2008). Note, when considering the photo-  
220 captured individuals that were also radio-collared, the conditional likelihoods must be combined  
221 before calculating a single marginal likelihood for each individual (Appendix S1). Royle *et al.*  
222 (2013) used data from different sets of individuals and assumed the data likelihoods were  
223 independent. The consequences of accommodating non-independent data include more precise  
224 estimation of activity centers for the captured individuals with collars and reduction of the  
225 effective sample size of individuals used to estimate the resource selection functions. Assuming  
226 independence between the data when the overlap of individuals is high would result in  
227 pseudoreplication problems (e.g., artificially reduced standard errors).

228

## 229 MODEL COMPARISONS WITH AND WITHOUT TELEMETRY

230 We compared inferences on multi-scale selection between the integrated SCR-RSF model and a  
231 standard SCR model (without telemetry data) using an information theoretic approach followed  
232 by parameter estimate comparisons for the relevant coefficients. We used model selection to  
233 identify the covariate structures with the best predictive performance for the data at each level of  
234 the hierarchical models, starting with movement scale ( $\sigma$ ), then encounter rate ( $\lambda$ ), and finally  
235 density ( $D$ ). A multi-staged approach was used to reduce the total set of candidate models: 1)  
236 select among covariates for  $\sigma$  with full covariate structures for  $\lambda$  and  $D$ ; 2) select among  
237 covariates for  $\lambda$  using the top covariates for  $\sigma$  and full structure for  $D$ ; and, 3) select among  
238 covariates for  $D$  using the top covariates for  $\sigma$  and  $\lambda$ . Candidate models for the encounter rate  
239 always included the behavioral effect ( $\alpha_{\text{behav}}$ ) given previous findings (Sirén *et al.* 2016a). This  
240 resulted in 5 candidate models for movement scale, 30 candidate models for encounter rate, and

241 2 candidate models for density. Our main focus was on parameter comparisons for  $\alpha_2$  (third-  
242 order selection) and  $\beta$  (second-order selection), both in terms of best supported model structures  
243 and differences in effect size and precision of the estimates, where applicable.

244 All models were fit using maximum likelihood methods with the `oSCR` package  
245 (Sutherland, Royle & Linden 2016) in R (R Core Team 2016). The `oSCR` package is an open-  
246 source alternative to `secr` (Efford 2016) for fitting certain spatial capture-recapture models  
247 using maximum likelihood. We integrated the R code from Royle *et al.* (2013) into `oSCR` and  
248 included an option for adjusting the marginal likelihood calculations to accommodate non-  
249 independent data. The candidate models were ranked using AIC and, to improve clarity for  
250 encounter rate comparisons, we removed from our model selection tables those variables with  
251 85% confidence intervals that included zero (Arnold 2010). Note, AIC cannot be directly  
252 compared between the standard SCR and integrated SCR-RSF model types given differences in  
253 the data likelihoods; we focus on the relative rankings of model structure. We used the top-  
254 ranked models to map the predicted encounter probability and expected density across the study  
255 area, illustrating variation in resource selection at each scale.

256

## 257 **Results**

258 The winter camera trapping resulted in 13 individuals (6 F; 7 M) captured 121 times in 2011 and  
259 15 individuals (6 F; 9 M) captured 86 times in 2012. Across years, the number of spatial  
260 encounters at unique trap pixels per individual ranged 1–10, with 50% having  $\leq 2$  and 25%  
261 having  $\geq 5$  spatial encounters. The number of radio-collared individuals was 6 (2 F; 4 M) in  
262 2011 and 8 (2 F; 6 M) in 2012, with a total of 147 and 218 telemetry locations, respectively,  
263 collected during each winter. Across years, the number of telemetry locations at unique pixels

264 per collared individual ranged 11–27 (median = 17.5). The proportion of encounters at camera  
265 traps attributed to radio-collared individuals was 0.73 in 2011 and 0.71 in 2012.

266 Model selection results indicated that an increased complexity in model structure was  
267 supported by the integrated SCR-RSF model with telemetry data compared to the standard SCR  
268 model without telemetry data (Tables 1–3). The top model structure for movement scale ( $\sigma$ )  
269 included no covariates (i.e., null; AICwt = 0.42) in the absence of telemetry and a sex  $\times$  year  
270 interaction (AICwt = 0.99) with telemetry (Table 1). Sex was also included as a covariate in the  
271 top model for encounter rate ( $\lambda$ ) without telemetry (Table 2), though model selection uncertainty  
272 suggested it was a marginal predictor at best (AICwt = 0.52); none of the spatial covariates were  
273 important predictors for encounter rate in the standard SCR model. The integrated SCR-RSF  
274 model supported variables corresponding to third-order resource selection (distance to mixed  
275 conifer forest and terrain ruggedness) in the top model structures for encounter rate (Table 2).  
276 Regardless of telemetry integration, variation in second-order resource selection was supported  
277 as distance to mixed conifers was considered an important predictor for density in both the  
278 standard SCR and integrated SCR-RSF models (Table 3).

279 Differences in parameter estimates for the top-ranked models further indicated how  
280 telemetry integration modified inferences on multiscale resource selection (Table 4). Population  
281 density decreased with increasing distance to mixed conifers for both top-ranked models and the  
282 effect size was larger without telemetry ( $\beta_{\text{mixed}} = -2.09$  [SE: 0.792]) than with telemetry ( $\beta_{\text{mixed}} =$   
283  $-0.79$  [0.397]). This reduction in effect size for density variation was due to the integrated SCR-  
284 RSF model attributing additional variation in the observed encounters to differences in encounter  
285 rate, including a decrease with increased distance to mixed conifers ( $\alpha_{2,\text{mixed}} = -0.11$  [SE:  
286 0.057]). Encounter rate also appeared to vary by terrain ruggedness, with a positive quadratic

287 relationship suggesting increased space use of terrain that was flat or extremely rugged, and  
288 lower use at moderate ruggedness ( $\alpha_{2, \text{vrm}} = -0.11$  [SE: 0.055];  $\alpha_{2, \text{vrm}^2} = 0.06$  [SE: 0.034]). While  
289 maps of expected density illustrated similar spatial patterns of 2<sup>nd</sup> order resource selection  
290 between the top-ranked models (Figure 2a,b), the standard SCR model with no telemetry data  
291 exhibited greater variation consistent with the larger estimate for  $\beta_{\text{mixed}}$ . We also mapped the  
292 predicted probability of encounter when  $d(\mathbf{x}_j, \mathbf{s}_i)^2 = 0$  to illustrate the spatial variation in 3<sup>rd</sup> order  
293 selection as indicated by the top-ranked integrated SCR-RSF model (Figure 2c). The overall  
294 predicted marten density (#/km<sup>2</sup>) for 2010–2011 was slightly lower for the standard SCR model  
295 (0.39/km<sup>2</sup> [95% CI: 0.29–0.56/ km<sup>2</sup>]) than the integrated SCR-RSF model (0.43/km<sup>2</sup> [95% CI:  
296 0.32–0.61/ km<sup>2</sup>]).

297 The top-ranked models also differed with regards to movement scale ( $\sigma$ ) variation and the  
298 predicted probabilities of activity center locations for collared individuals. The standard SCR  
299 model did not support any variation in movement scale, with an average  $\sigma = \exp(\delta_0) = 0.79$  km  
300 (95% CI: 0.70–0.90 km), while the integrated SCR-RSF model suggested an interaction between  
301 sex and year such that female marten in 2012 had a lower movement scale than all other  
302 individuals (Table 4). The precision of the activity center predictions was significantly increased  
303 for collared individuals when telemetry data were integrated (Figure 3), underscoring the value  
304 of using a non-independent likelihood.

305

## 306 **Discussion**

307 Integrated modeling methods allow ecologists to bring together multiple data sources to expand  
308 the scope of potential inferences for and enhance understanding of complex ecological systems.  
309 The recent growth of these techniques coincides with the development of hierarchical models

310 (Gimenez *et al.* 2014), which posit data generation as a combination of observation processes  
311 and latent ecological processes (Royle & Dorazio 2008). When multiple sources of data provide  
312 information on the same ecological processes of interest, joint data likelihoods can be defined to  
313 explicitly link diverse observations and improve estimation of model parameters describing  
314 relevant phenomena. The result is an increased ability for ecologists to join empirical data to  
315 ecological theory using robust quantitative approaches.

316         The integrated SCR-RSF model developed by Royle *et al.* (2013) connects observed  
317 spatial encounters of animals to established theory on multi-scale resource selection (Johnson  
318 1980). By combining data from devices that differ in their ability to target variation at specific  
319 scales (i.e., individual vs. population level), the model is better able to simultaneously describe  
320 both scales. Our application of the integrated SCR-RSF model allowed for more complex  
321 covariate relationships with parameters related to individual movement and multi-scale resource  
322 selection of marten than possible under standard SCR model fitting. In the absence of telemetry  
323 data, spatial variation in third-order selection (i.e., through encounter rate) could not be detected  
324 with the camera trap observations and instead, the standard SCR model suggested more variation  
325 in second-order selection. Both model types indicated that expected marten density decreased  
326 with increasing distance to mixed conifers. So while the camera trap data alone were sufficient  
327 for identifying an existing density relationship, the slope of this relationship was potentially  
328 biased due to unmodeled heterogeneity in encounter rate. The integrated SCR-RSF model  
329 indicated that areas of the landscape with relatively short distances to mixed conifer forest had  
330 more marten, and those marten spent more time in these locations. Additional model complexity  
331 supported by our telemetry integration included an interaction between sex and year on  
332 movement scale ( $\sigma$ ), with female marten in 2012 being encountered at shorter distances from

333 their activity centers than individuals of either sex in other years. The standard SCR model had  
334 little power to detect variation in  $\sigma$  according to locations of spatial encounters at camera traps  
335 alone, likely due to small sample sizes. Similarly, the small number and strategic placement  
336 (i.e., to increase encounters) of camera traps made it difficult to detect variation in encounter rate  
337 according to spatial environmental variables without the additional data provided by telemetry.

338         Telemetry has been used in multiple ways as an auxiliary data source to improve  
339 inferences from population size estimation, including both ad-hoc adjustments (Soisalo &  
340 Cavalcanti 2006) and more recent joint modeling techniques (Ivan, White & Shenk 2013; Bird *et al.*  
341 *et al.* 2014). Spatially-explicit applications have generally focused on the contribution of telemetry  
342 data to informing the scale of individual movement in SCR models for the purposes of  
343 improving the precision and/or identifiability of parameter estimates (Sollmann *et al.* 2013a;  
344 Sollmann *et al.* 2013b). Even as few as  $N_{tel} = 3$  collared individuals with an adequate collection  
345 of telemetry locations can greatly increase the precision of the  $\sigma$  estimate (Royle *et al.* 2013),  
346 though such small sample sizes will limit the exploration of potentially important relationships  
347 with individual attributes (e.g., sex; Sollmann *et al.* 2013a). Here we had some flexibility with  
348  $N_{tel} = 14$  collared martens and were able to model more variation in  $\sigma$ , though at the expense of a  
349 significant improvement in precision (Table 4). Most importantly, we were better able to model  
350 variation in encounter rate as it related to individual space use due to the relatively large  
351 collection of telemetry locations.

352         Proffitt *et al.* (2015) is the only other application we could find where telemetry-informed  
353 resource selection was integrated into an SCR framework in the vein of Royle *et al.* (2013).  
354 Their analysis involved a two-stage approach where 30+ years of radiotelemetry data on  
355 mountain lions (*Puma concolor*) were used to estimate and validate an RSF that corresponded to



356 second-order selection (Robinson *et al.* 2015); spatial predictions from the RSF were then  
357 specified as a density covariate in an SCR model fitted to search encounter data collected during  
358 a 4-month sampling period. The RSF covariate appeared to improve the accuracy and precision  
359 of density estimates (Proffitt *et al.* 2015), yet, without integrating the telemetry data into the  
360 likelihood directly, their analysis could not incorporate information on third-order selection or  
361 benefit from increased precision in  $\sigma$  estimates. The latter may have provided a significant  
362 improvement due to the small number of spatial encounters and could have alternatively been  
363 achieved in their Bayesian modeling approach by using an informed prior for  $\sigma$  calculated from  
364 the 18,000+ telemetry locations on 85 individuals (Proffitt *et al.* 2015). The individuals in the  
365 telemetry data need to be representative of the focal population being exposed to capture and the  
366 degree to which this is true will dictate how many model parameter estimates can reasonably be  
367 shared between the data.

368         The marten study consisted of individuals that overlapped entirely between the telemetry  
369 and camera-trap data, as all radio-collared individuals were also photo captured. While this  
370 obviously addressed concerns about collared individuals being representative of the focal  
371 population targeted by camera traps, it required a modification to the joint likelihood (Appendix  
372 S1) originally constructed under an assumption of data independence (Royle *et al.* 2013). The  
373 primary benefit to our joint likelihood came from the increased precision of predicted activity  
374 centers for collared individuals (Figure 3), which theoretically should have improved estimation  
375 of the inhomogeneous point process model for density and the conditional probabilities of  
376 encounter. The resulting inferences were mostly similar to the separate analyses previously  
377 described by Sirén *et al.* (2016a) and Sirén *et al.* (2016b) regarding average density and multi-  
378 scale resource selection, respectively, of American marten in alpine forests of New England.

379 Sirén *et al.* (2016b) used a “design III” approach to fitting an RSF (Manly *et al.* 2002) and found  
380 that regenerating forest was the most important factor influencing second-order resource  
381 selection by marten, as individuals tended to avoid it on the landscape. Here, our  
382 inhomogeneous point process was akin to a “design II” approach (Manly *et al.* 2002) and we  
383 used proximity metrics (e.g., distance to feature) instead of compositional metrics for the spatial  
384 habitat covariates; therefore, some differences were to be expected. In other landscapes of  
385 eastern North America, marten have similarly exhibited second- and third-order selection for  
386 older-aged mixedwood forest (Potvin, Bélanger & Lowell 2000; Cheveau *et al.* 2013). In the  
387 present analysis, density estimation was simultaneously modulated by both second-order and  
388 third-order resource selection, which were found to be important predictors of variation in the  
389 observed spatial encounters for both camera traps and telemetry locations.

390 In summary, the integrated SCR-RSF model addresses concerns regarding heterogeneity  
391 in capture due to individual space use which can otherwise generate bias in the estimation of  
392 density using spatial capture-recapture models (Royle *et al.* 2013). The increased popularity in  
393 using SCR to estimate density of rare, wide-ranging species (e.g., carnivores) will result in many  
394 sparse datasets that are unlikely to support complex encounter models (Sollmann *et al.* 2013a).  
395 Adding several individuals with VHF or GPS collars to provide an auxiliary source of movement  
396 information can increase the accuracy and precision of inferences from spatial encounter designs,  
397 particularly when species are selecting resources at multiple scales. Using the modified  
398 likelihood as made available in  $\circ$ SCR (Sutherland, Royle & Linden 2016) will allow researchers  
399 with data sets containing heavy overlap of individuals to fit integrated SCR-RSF models that can  
400 accommodate the lack of independence and improve parameter estimation. Integrated modeling  
401 approaches allow ecologists to make inferences with the best available information and improve

402 our understanding of ecological systems and our ability to develop effective conservation and  
403 management strategies.

404

#### 405 **Acknowledgments**

406 Funding for this project was provided through New Hampshire State Wildlife Grant T2-1-R in  
407 cooperation with the United States Fish and Wildlife Service. Additional support was provided  
408 by the Department of Interior, Northeast Climate Science Center. We would like to thank  
409 Wagner Forest Management, American Forest Management, and lessee Brookfield Renewable  
410 Power for providing access to the study area. The New Hampshire Fish and Game Department,  
411 United States Fish and Wildlife Service, and Stantec Environmental Consultants provided  
412 invaluable assistance, equipment, and lodging. W. Staats, J. Kilborn, A. Timmins, H. Jones, and  
413 Z. Smith provided invaluable field assistance.

#### 414 **Data accessibility**

415 Data will be archived with Dryad Digital Repository.

416 **References**

- 417 Arnold, T.W. (2010) Uninformative Parameters and Model Selection Using Akaike's  
418 Information Criterion. *Journal of Wildlife Management*, **74**, 1175-1178.
- 419 Auger-Methe, M., Field, C., Albertsen, C.M., Derocher, A.E., Lewis, M.A., Jonsen, I.D. &  
420 Flemming, J.M. (2016) State-space models' dirty little secrets: even simple linear  
421 Gaussian models can have estimation problems. *Scientific Reports*, **6**, 26677.
- 422 Bird, T., Lyon, J., Nicol, S., McCarthy, M. & Barker, R. (2014) Estimating population size in the  
423 presence of temporary migration using a joint analysis of telemetry and capture-recapture  
424 data. *Methods in Ecology and Evolution*, **5**, 615-625.
- 425 Bolker, B.M., Gardner, B., Maunder, M., Berg, C.W., Brooks, M., Comita, L., Crone, E.,  
426 Cubaynes, S., Davies, T., de Valpine, P., Ford, J., Gimenez, O., Kéry, M., Kim, E.J.,  
427 Lennert-Cody, C., Magnusson, A., Martell, S., Nash, J., Nielsen, A., Regetz, J., Skaug, H.  
428 & Zipkin, E. (2013) Strategies for fitting nonlinear ecological models in R, AD Model  
429 Builder, and BUGS. *Methods in Ecology and Evolution*, **4**, 501-512.
- 430 Borchers, D.L. & Efford, M.G. (2008) Spatially explicit maximum likelihood methods for  
431 capture-recapture studies. *Biometrics*, **64**, 377-385.
- 432 Carroll, C. (2007) Interacting effects of climate change, landscape conversion, and harvest on  
433 carnivore populations at the range margin: Marten and Lynx in the northern  
434 Appalachians. *Conservation Biology*, **21**, 1092-1104.
- 435 Chandler, R.B. & Clark, J.D. (2014) Spatially explicit integrated population models. *Methods in*  
436 *Ecology and Evolution*, **5**, 1351-1360.

- 437 Cheveau, M., Imbeau, L., Drapeau, P. & Belanger, L. (2013) Marten space use and habitat  
438 selection in managed coniferous boreal forests of eastern Canada. *The Journal of Wildlife*  
439 *Management*, **77**, 749-760.
- 440 Dorazio, R.M. & Royle, J.A. (2003) Mixture models for estimating the size of a closed  
441 population when capture rates vary among individuals. *Biometrics*, **59**, 351-364.
- 442 Efford, M. (2004) Density estimation in live-trapping studies. *Oikos*, **106**, 598-610.
- 443 Efford, M. (2016) secr: Spatially explicit capture–recapture models. R package version 2.10.2.  
444 <http://CRAN.R-project.org/package=secur>
- 445 Efford, M.G. (2015) Density surfaces in secr 2.10. Accessed on 7 Dec 2016.  
446 <http://www.otago.ac.nz/density/pdfs/secur-densitysurfaces.pdf>
- 447 Efford, M.G. & Fewster, R.M. (2013) Estimating population size by spatially explicit capture-  
448 recapture. *Oikos*, **122**, 918-928.
- 449 Gimenez, O., Buckland, S.T., Morgan, B.J.T., Bez, N., Bertrand, S., Choquet, R., Dray, S.,  
450 Etienne, M.P., Fewster, R., Gosselin, F., Merigot, B., Monestiez, P., Morales, J.M.,  
451 Mortier, F., Munoz, F., Ovaskainen, O., Pavoine, S., Pradel, R., Schurr, F.M., Thomas,  
452 L., Thuiller, W., Trenkel, V., de Valpine, P. & Rexstad, E. (2014) Statistical ecology  
453 comes of age. *Biology Letters*, **10**, 4.
- 454 Ivan, J.S., White, G.C. & Shenk, T.M. (2013) Using auxiliary telemetry information to estimate  
455 animal density from capture-recapture data. *Ecology*, **94**, 809-816.
- 456 Johnson, D.H. (1980) The comparison of usage and availability measurements for evaluating  
457 resource preference. *Ecology*, **61**, 65-71.

- 458 Manly, B., McDonald, L., Thomas, D., McDonald, T. & Erickson, W. (2002) *Resource selection*  
459 *by animals: statistical analysis and design for field studies*, Second edn. Kluwer Press,  
460 New York, New York, USA.
- 461 Potvin, F., Bélanger, L. & Lowell, K. (2000) Marten habitat selection in a clearcut boreal  
462 landscape. *Conservation Biology*, **14**, 844-857.
- 463 Proffitt, K.M., Goldberg, J.F., Hebblewhite, M., Russell, R., Jimenez, B.S., Robinson, H.S.,  
464 Pilgrim, K. & Schwartz, M.K. (2015) Integrating resource selection into spatial capture-  
465 recapture models for large carnivores. *Ecosphere*, **6**.
- 466 R Core Team (2016) R: A language environment for statistical computing. R Foundation for  
467 Statistical Computing <http://www.R-project.org/>
- 468 Robinson, H.S., Ruth, T., Gude, J.A., Choate, D., DeSimone, R., Hebblewhite, M., Kunkel, K.,  
469 Matchett, M.R., Mitchell, M.S., Murphy, K. & Williams, J. (2015) Linking resource  
470 selection and mortality modeling for population estimation of mountain lions in Montana.  
471 *Ecological Modelling*, **312**, 11-25.
- 472 Royle, J.A., Chandler, R.B., Sollmann, R. & Gardner, B. (2014) *Spatial capture-recapture*.  
473 Academic Press, Waltham, MA, USA.
- 474 Royle, J.A., Chandler, R.B., Sun, C.C. & Fuller, A.K. (2013) Integrating resource selection  
475 information with spatial capture-recapture. *Methods in Ecology and Evolution*, **4**, 520-  
476 530.
- 477 Royle, J.A. & Dorazio, R.M. (2008) *Hierarchical modeling and inference in ecology*. Academic  
478 Press, Boston, USA.
- 479 Royle, J.A., Fuller, A.K. & Sutherland, C. (2017) Unifying Population and Landscape Ecology  
480 with Spatial Capture-recapture. *bioRxiv*, 103341.

- 481 Royle, J.A., Sutherland, C., Fuller, A.K. & Sun, C.C. (2015) Likelihood analysis of spatial  
482 capture-recapture models for stratified or class structured populations. *Ecosphere*, **6**, 22.
- 483 Royle, J.A. & Young, K.V. (2008) A hierarchical model for spatial capture-recapture data.  
484 *Ecology*, **89**, 2281-2289.
- 485 Sappington, J.M., Longshore, K.M. & Thompson, D.B. (2007) Quantifying landscape  
486 ruggedness for animal habitat analysis: A case study using bighorn sheep in the Mojave  
487 Desert. *Journal of Wildlife Management*, **71**, 1419-1426.
- 488 Sirén, A.P.K., Pekins, P.J., Abdu, P.L. & Ducey, M.J. (2016a) Identification and density  
489 estimation of American martens (*Martes americana*) using a novel camera-trap method.  
490 *Diversity*, **8**, 3.
- 491 Sirén, A.P.K., Pekins, P.J., Ducey, M.J. & Kilborn, J.R. (2016b) Spatial ecology and resource  
492 selection of a high-elevation American marten (*Martes americana*) population in the  
493 northeastern United States. *Canadian Journal of Zoology*, **94**, 169-180.
- 494 Soisalo, M.K. & Cavalcanti, S.M.C. (2006) Estimating the density of a jaguar population in the  
495 Brazilian Pantanal using camera-traps and capture-recapture sampling in combination  
496 with GPS radio-telemetry. *Biological Conservation*, **129**, 487-496.
- 497 Sollmann, R., Gardner, B., Chandler, R.B., Shindle, D.B., Onorato, D.P., Royle, J.A. &  
498 O'Connell, A.F. (2013a) Using multiple data sources provides density estimates for  
499 endangered Florida panther. *Journal of Applied Ecology*, **50**, 961-968.
- 500 Sollmann, R., Gardner, B., Parsons, A.W., Stocking, J.J., McClintock, B.T., Simons, T.R.,  
501 Pollock, K.H. & O'Connell, A.F. (2013b) A spatial mark-resight model augmented with  
502 telemetry data. *Ecology*, **94**, 553-559.

503 Sutherland, C., Royle, J.A. & Linden, D.W. (2016) oSCR: Multi-Session Sex-Structured Spatial  
504 Capture-Recapture Models. R package version 0.30.1. <https://github.com/jaroyale/oSCR>  
505



506 Table 1. Model selection results for covariates influencing marten movement scale ( $\sigma_i$ ) using  
 507 fully parameterized models for density ( $D_g$ ) and encounter rate ( $\lambda_{ijk}$ ) both without telemetry and  
 508 with telemetry integration. Covariates specified here include year (yr) and sex; models with  
 509 interactions or quadratic terms always included the linear terms.

| Model                                                 | nPar | AIC     | $\Delta$ AIC | AICwt | LogLik  |
|-------------------------------------------------------|------|---------|--------------|-------|---------|
| No telemetry                                          |      |         |              |       |         |
| $D(*) \lambda(*) \sigma(\cdot)$                       | 12   | 1496.10 | 0.00         | 0.42  | 736.05  |
| $D(*) \lambda(*) \sigma(\text{yr})$                   | 13   | 1497.16 | 1.06         | 0.25  | 735.58  |
| $D(*) \lambda(*) \sigma(\text{sex})$                  | 13   | 1498.05 | 1.95         | 0.16  | 736.02  |
| $D(*) \lambda(*) \sigma(\text{yr} + \text{sex})$      | 14   | 1498.82 | 2.72         | 0.11  | 735.41  |
| $D(*) \lambda(*) \sigma(\text{yr} \times \text{sex})$ | 15   | 1500.11 | 4.01         | 0.06  | 734.06  |
| Telemetry                                             |      |         |              |       |         |
| $D(*) \lambda(*) \sigma(\text{yr} \times \text{sex})$ | 15   | 5327.34 | 0.00         | 0.99  | 2648.67 |
| $D(*) \lambda(*) \sigma(\text{yr} + \text{sex})$      | 14   | 5336.79 | 9.45         | 0.01  | 2654.39 |
| $D(*) \lambda(*) \sigma(\text{sex})$                  | 13   | 5345.30 | 17.96        | 0.00  | 2659.65 |
| $D(*) \lambda(*) \sigma(\text{yr})$                   | 13   | 5346.79 | 19.45        | 0.00  | 2660.39 |
| $D(*) \lambda(*) \sigma(\cdot)$                       | 12   | 5350.74 | 23.39        | 0.00  | 2663.37 |

510

511 Table 2. Model selection results for covariates influencing marten encounter rate ( $\lambda_{ijk}$ ) using the  
 512 top model for movement scale ( $\sigma_i$ ) and the fully parameterized model for density ( $D_g$ ) both  
 513 without telemetry and with telemetry integration. Covariates specified here include distance to  
 514 mixed forest (mixed), terrain ruggedness (vrm,  $\text{vrm}^2$ ), year (yr), sex, and a trap-specific  
 515 behavioral response (b); models with interactions or quadratic terms always included the linear  
 516 terms. Models having variables with 85% confidence intervals that included zero are not listed.

| Model                                                                                          | nPar | AIC     | $\Delta$ AIC | AICwt | LogLik  |
|------------------------------------------------------------------------------------------------|------|---------|--------------|-------|---------|
| No telemetry                                                                                   |      |         |              |       |         |
| $D(*) \lambda(\text{behav} + \text{sex}) \sigma(\cdot)$                                        | 7    | 1487.70 | 0.00         | 0.52  | 736.85  |
| $D(*) \lambda(\text{behav}) \sigma(\cdot)$                                                     | 6    | 1487.85 | 0.15         | 0.48  | 737.93  |
| Telemetry                                                                                      |      |         |              |       |         |
| $D(*) \lambda(\text{behav} + \text{mixed} + \text{vrm}^2) \sigma(\text{yr} \times \text{sex})$ | 12   | 5324.80 | 0.00         | 0.36  | 2650.4  |
| $D(*) \lambda(\text{behav} + \text{mixed} + \text{vrm}) \sigma(\text{yr} \times \text{sex})$   | 11   | 5326.10 | 1.29         | 0.19  | 2652.05 |
| $D(*) \lambda(\text{behav} + \text{vrm}^2) \sigma(\text{yr} \times \text{sex})$                | 11   | 5326.40 | 1.59         | 0.16  | 2652.2  |
| $D(*) \lambda(\text{behav} + \text{mixed}) \sigma(\text{yr} \times \text{sex})$                | 10   | 5327.03 | 2.22         | 0.12  | 2653.51 |
| $D(*) \lambda(\text{behav} + \text{mixed} + \text{vrm}^2) \sigma(\text{yr} \times \text{sex})$ | 9    | 5327.41 | 2.61         | 0.10  | 2654.71 |
| $D(*) \lambda(\text{behav} + \text{vrm}) \sigma(\text{yr} \times \text{sex})$                  | 10   | 5327.67 | 2.86         | 0.08  | 2653.83 |

517

518 Table 3. Model selection results for covariates influencing marten density ( $D_g$ ) using the top  
 519 models for movement scale ( $\sigma_i$ ) and encounter rate ( $\lambda_{ijk}$ ) both without telemetry and with  
 520 telemetry integration. Covariates specified here include distance to mixed forest (mixed), terrain  
 521 ruggedness (vrm,  $vrm^2$ ), year (yr), sex, and a trap-specific behavioral response (b); models with  
 522 interactions or quadratic terms always included the linear terms.

| Model                                                                                                     | nPar | AIC     | $\Delta$ AIC | AICwt | LogLik  |
|-----------------------------------------------------------------------------------------------------------|------|---------|--------------|-------|---------|
| No telemetry                                                                                              |      |         |              |       |         |
| $D(\text{mixed}) \lambda(\text{behav} + \text{sex}) \sigma(\cdot)$                                        | 7    | 1487.70 | 0.00         | 0.99  | 736.85  |
| $D(\cdot) \lambda(\text{behav} + \text{sex}) \sigma(\cdot)$                                               | 6    | 1497.88 | 10.18        | 0.01  | 742.94  |
| Telemetry                                                                                                 |      |         |              |       |         |
| $D(\text{mixed}) \lambda(\text{behav} + \text{mixed} + \text{vrm}^2) \sigma(\text{yr} \times \text{sex})$ | 12   | 5324.80 | 0.00         | 0.85  | 2650.40 |
| $D(\cdot) \lambda(\text{behav} + \text{mixed} + \text{vrm}^2) \sigma(\text{yr} \times \text{sex})$        | 11   | 5328.32 | 3.52         | 0.15  | 2653.16 |

523

524

525 Table 4. Maximum likelihood estimates (with standard errors) from the top-ranked spatial  
 526 capture-recapture models.

| Parameter                             | No telemetry  | Telemetry     |
|---------------------------------------|---------------|---------------|
| Movement scale: $\log(\sigma_i)$      |               |               |
| $\delta_0$                            | -0.23 (0.063) | -0.39 (0.055) |
| $\delta_{2012}$                       | –             | -0.37 (0.083) |
| $\delta_{\text{male}}$                | –             | 0.07 (0.066)  |
| $\delta_{2012,\text{male}}$           | –             | 0.32 (0.097)  |
| Encounter rate: $\log(\lambda_{ijk})$ |               |               |
| $\alpha_0$                            | -2.54 (0.228) | -2.11 (0.141) |
| $\alpha_{2,\text{mixed}}$             | –             | -0.11 (0.057) |
| $\alpha_{2,\text{vrm}}$               | –             | -0.11 (0.055) |
| $\alpha_{2,\text{vrm}2}$              | –             | 0.06 (0.034)  |
| $\alpha_{2012}$                       | –             | –             |
| $\alpha_{\text{male}}$                | 0.29 (0.201)  | –             |
| $\alpha_{2012,\text{male}}$           | –             | –             |
| $\alpha_{\text{behav}}$               | 1.33 (0.174)  | 1.19 (0.151)  |
| Density: $\log(E(D_g))$               |               |               |
| $\beta_0$                             | -5.58 (0.869) | -4.32 (0.311) |
| $\beta_{\text{mixed}}$                | -2.09 (0.792) | -0.79 (0.397) |

527

528

529 Figure 1. Map of marten study area in northern New Hampshire, USA, reproduced with some  
530 modification from Sirén *et al.* (2016a).

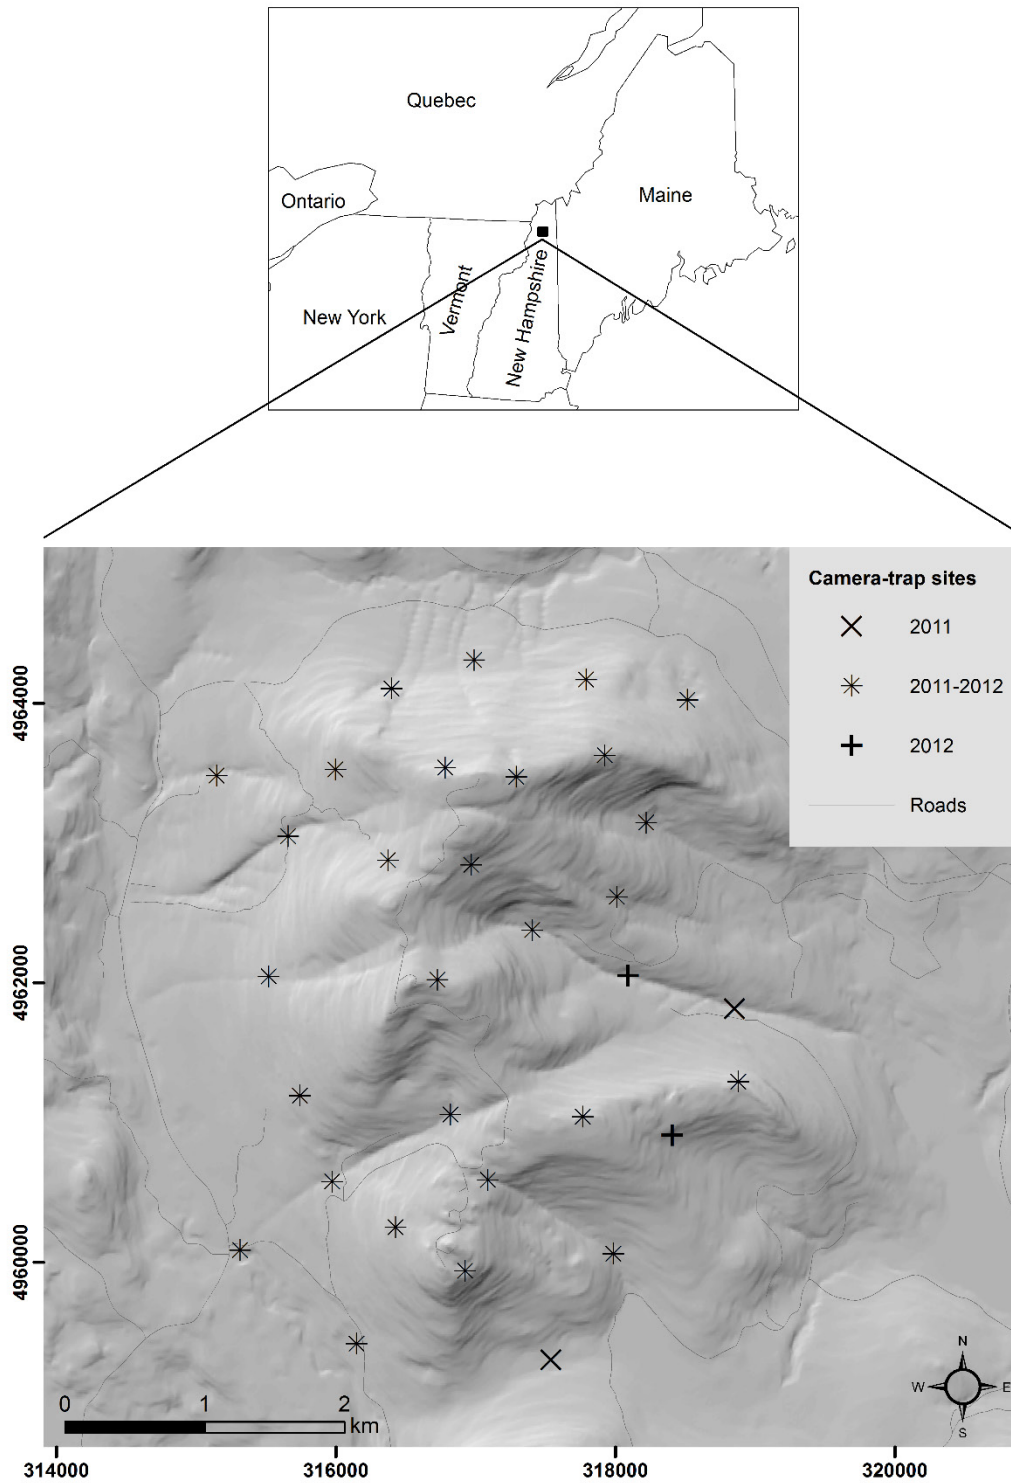

531

532 Figure 2. Predicted density of marten ( $\#/km^2$ ) under the integrated SCR-RSF model with  
533 telemetry (a) and a standard SCR model with no telemetry (b), illustrating 2<sup>nd</sup> order resource  
534 selection. In addition, we map the predicted encounter probability for the integrated model (c),  
535 illustrating 3<sup>rd</sup> order resource selection. Blank interior pixels represent water.  
536

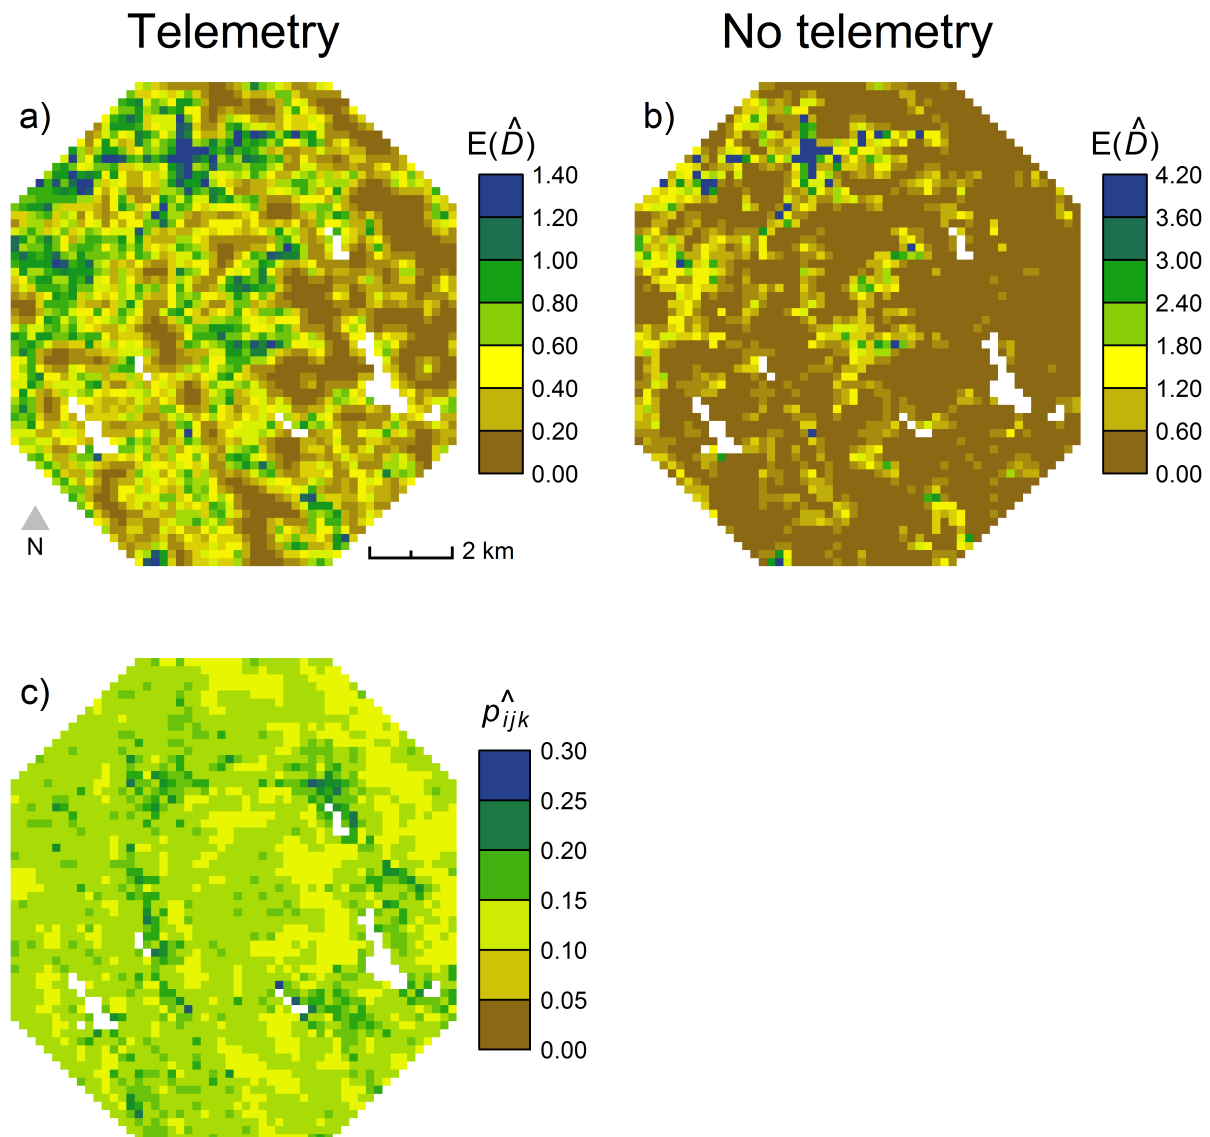

537

538 Figure 3. Probability densities of the activity center  $s_i$  in pixel  $g$  for one radio-collared male  
539 marten in 2012 from the integrated SCR-RSF model with telemetry (a) and a standard SCR  
540 model with no telemetry (b). Crosses represent camera traps and black dots represent spatial  
541 encounters within a 200 m pixel recorded by cameras and/or telemetry fixes.  
542

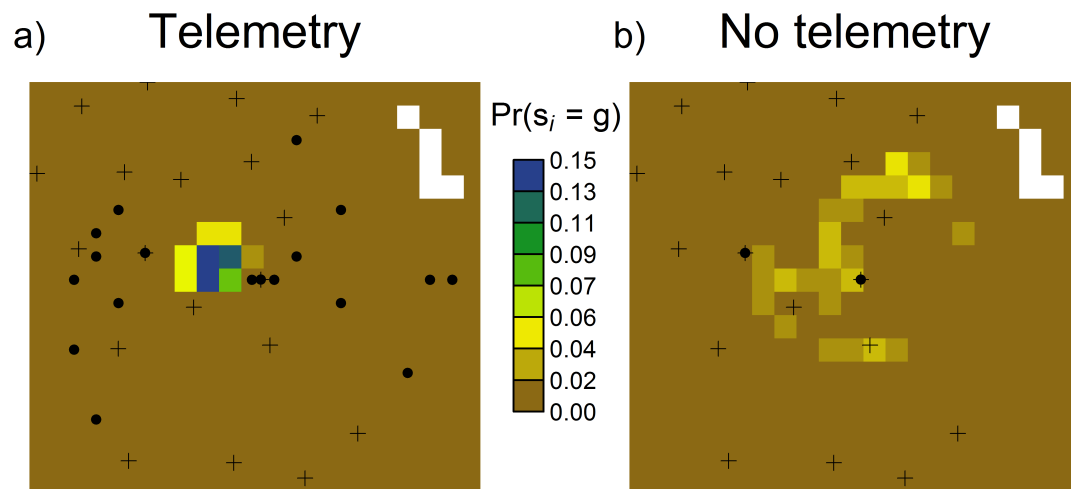

543

## 544 **Appendix S1. Likelihood for integrated SCR-RSF model with non-independence**

545

546 Royle et al. (2013; Supplement 1) described the full likelihood for the integrated SCR-RSF  
547 model assuming that the capture data and telemetry data were independent. To accommodate the  
548 marten study where all collared individuals were also photo-captured, the conditional likelihoods  
549 need to be combined before calculating the marginal likelihood for each individual. We do not  
550 describe all components of the likelihoods here as they are fully described in Royle et al. (2013;  
551 Supplement 1); we instead emphasize the main differences between the independent and non-  
552 independent formulations. In addition, our model description here is simplified to match that of  
553 Royle et al. (2013), removing some details specific to the marten study.

554 When the datasets are independent, the total likelihood for the integrated SCR-RSF  
555 model is the product of the likelihoods for the capture data (SCR) and the telemetry data (RSF):

$$556 L_{rsf+scr}(\boldsymbol{\alpha}, N; \mathbf{y}, \mathbf{m}) = L_{scr}(\alpha_0, \alpha_1, \alpha_2, N; \mathbf{y}) \times L_{rsf}(\alpha_1, \alpha_2; \mathbf{m})$$

557 Here the  $\boldsymbol{\alpha}$  parameters correspond to variation in the encounter rate (for spatial encounters,  $\mathbf{y}$ ) and  
558 usage rate (for telemetry locations,  $\mathbf{m}$ ), while population size ( $N$ ) is only estimated from the SCR  
559 model. Note that  $\alpha_0$  only appears in the SCR likelihood as it corresponds to the baseline  
560 encounter rate and does not involve spatial variation. The other parameters represent availability  
561 ( $\alpha_1$ ), conditional on the latent activity centers ( $\mathbf{s}$ ), and resource selection ( $\alpha_2$ ).

562 The conditional-on- $\mathbf{s}$  likelihoods, here represented as  $f(\text{data} | \mathbf{s}, \text{parameters})$ , differ  
563 according to the observation models for the capture data and the telemetry data. The marginal  
564 distributions, here represented as  $f(\text{data} | \text{parameters})$ , for each individual  $i$  are calculated by  
565 integrating the conditional-on- $\mathbf{s}$  likelihoods over the possible locations for the individual activity  
566 centers,  $\mathbf{s}_i$ :



567 
$$f(\mathbf{y}_i | \boldsymbol{\alpha}) = \int_S f(\mathbf{y}_i | \mathbf{s}_i, \boldsymbol{\alpha}) g(\mathbf{s}_i) d\mathbf{s}_i$$

568 
$$f(\mathbf{m}_i | \boldsymbol{\alpha}) = \int_S f(\mathbf{m}_i | \mathbf{s}_i, \boldsymbol{\alpha}) g(\mathbf{s}_i) d\mathbf{s}_i$$

569 Here,  $S$  represents the continuous state space over which the integral is calculated and  $g(\mathbf{s}_i) =$   
 570  $1/||S||$  when density does not vary, indicating a homogeneous point process for activity centers  
 571 (note: we used a discrete state space and an inhomogeneous point process (Borchers & Efford  
 572 2008) for the marten study). The likelihoods for all observed individuals in the data ( $n$  for  
 573 captures,  $N_{tel}$  for telemetry) are then the products of the individual likelihoods:

574 
$$L_{scr}(\boldsymbol{\alpha} | \mathbf{y}_1, \mathbf{y}_2, \dots, \mathbf{y}_n) = \prod_{i=1}^n f(\mathbf{y}_i | \boldsymbol{\alpha})$$

575 
$$L_{rsf}(\boldsymbol{\alpha} | \mathbf{m}_1, \mathbf{m}_2, \dots, \mathbf{m}_{N_{tel}}) = \prod_{i=1}^{N_{tel}} f(\mathbf{m}_i | \boldsymbol{\alpha})$$

576 As described earlier, the product of these two data likelihoods then provides the total likelihood.  
 577 Royle et al. (2013; Supplement) provide a more complete description of the likelihoods,  
 578 including the important contribution of unobserved individuals for estimating  $N$  from the capture  
 579 data. We do not highlight the components of the likelihood that remain the same regardless of  
 580 independence between datasets.

581 In applications where the data sources are not independent (including the marten study),  
 582 the individual conditional-on-s likelihoods for each data source must be combined before  
 583 computing the marginal likelihood for each individual. When all collared individuals are also  
 584 captured, the marginal likelihood for collared individuals is as follows:

585 
$$f(\mathbf{y}_i, \mathbf{m}_i | \boldsymbol{\alpha}) = \int_S f(\mathbf{y}_i | \mathbf{s}_i, \boldsymbol{\alpha}) f(\mathbf{m}_i | \mathbf{s}_i, \boldsymbol{\alpha}) g(\mathbf{s}_i) d\mathbf{s}_i$$

586 The marginal likelihood for the  $n - N_{tel}$  individuals that were captured but not collared does not  
587 change. The joint likelihood for the observations, assuming collared individuals are sorted first,  
588 is then:

$$589 \quad L_{scr|rsf}(\boldsymbol{\alpha} | \mathbf{y}, \mathbf{m}) = \prod_{i=1}^{N_{tel}} f(\mathbf{y}_i, \mathbf{m}_i | \boldsymbol{\alpha}) \times \prod_{i=N_{tel}+1}^n f(\mathbf{y}_i | \boldsymbol{\alpha})$$

590 In this way, the likelihood for the telemetry data becomes embedded in the likelihood for  
591 the capture data for those collared individuals that were also captured. If there were also some  
592 collared individuals that were never captured, the joint likelihood would involve the product of  
593 the two components above and a third representing the marginal distribution of the telemetry  
594 data. Thus, depending on how individuals overlap between data sets, there are three potential  
595 marginal distributions to calculate for the observed individuals: 1) captures only; 2) collars only;  
596 and 3) captures and collars. Assuming independence, only #1 and #2 are used in the joint  
597 likelihood. The marten study here consisted of #1 and #3. The integrated likelihood in  $\circ SCR$   
598 (Sutherland, Royle & Linden 2016) currently supports model fitting to data consisting of #1 and  
599 combinations involving #1 and #2, and #1 and #3.

600

601

602

603 **References**

- 604 Royle, J.A., Chandler, R.B., Sun, C.C. & Fuller, A.K. (2013) Integrating resource selection  
605 information with spatial capture-recapture. *Methods in Ecology and Evolution*, **4**, 520-  
606 530.
- 607 Sutherland, C., Royle, J.A. & Linden, D.W. (2016) oSCR: Multi-Session Sex-Structured Spatial  
608 Capture-Recapture Models. R package version 0.30.1. <https://github.com/jaroyle/oSCR>  
609
